# Supplementary material for: Activation and allosteric regulation of the orphan GPR88-Gi1 signaling complex
Source: PubMed Central journal article supplement (PMC9061749; doi:10.1038/s41467-022-30081-5), 2022-05-02
Supplement: 41467_2022_30081_MOESM1_ESM.pdf [file 41467_2022_30081_MOESM1_ESM.pdf]

**Supplementary Information for Activation and  
allosteric regulation of the orphan GPR88-Gi1  
signaling complex**

Chen *et al.*

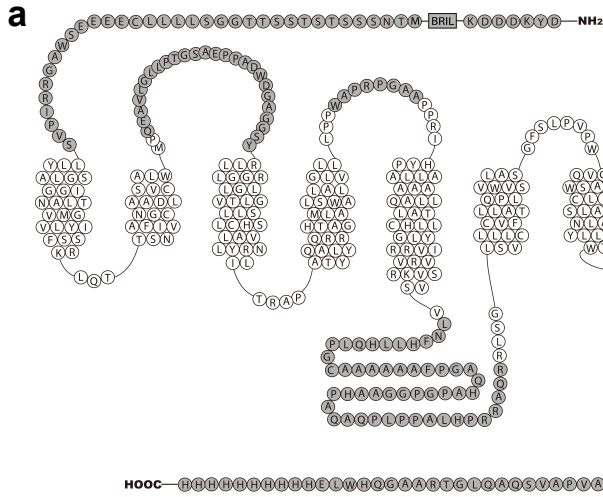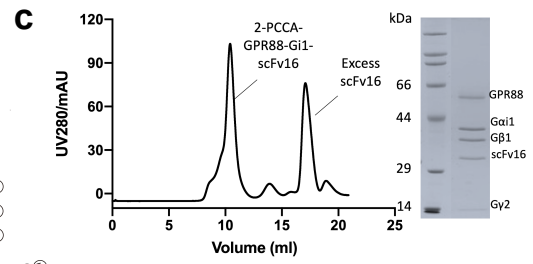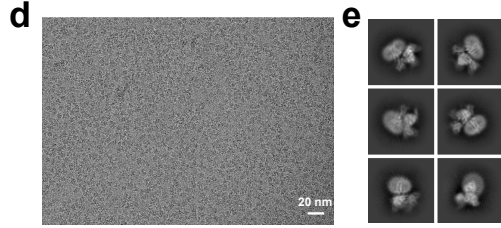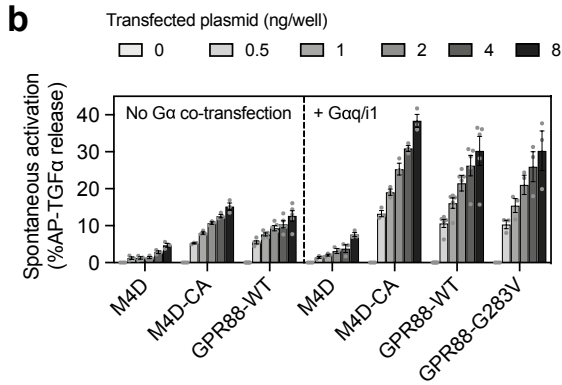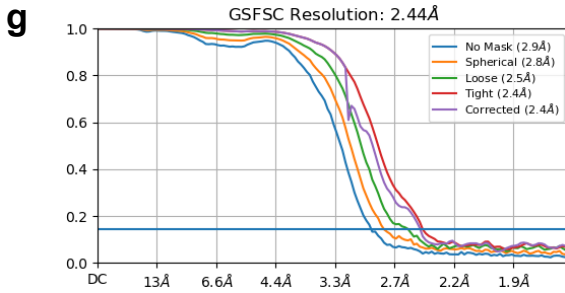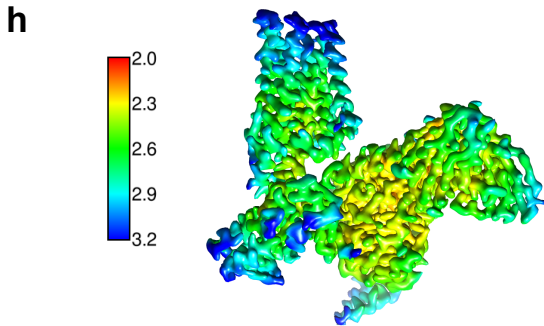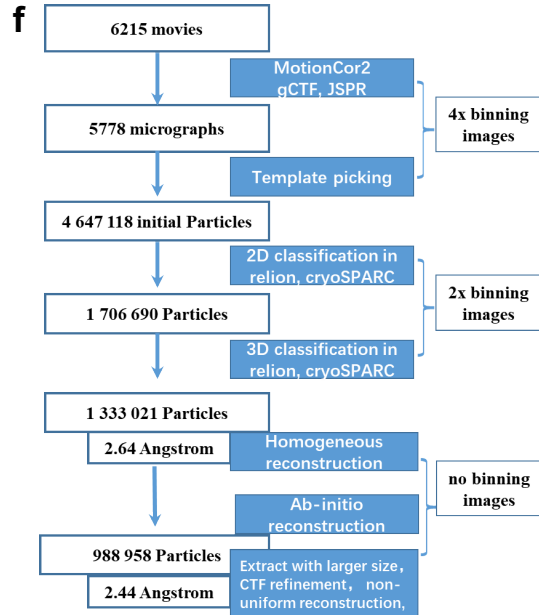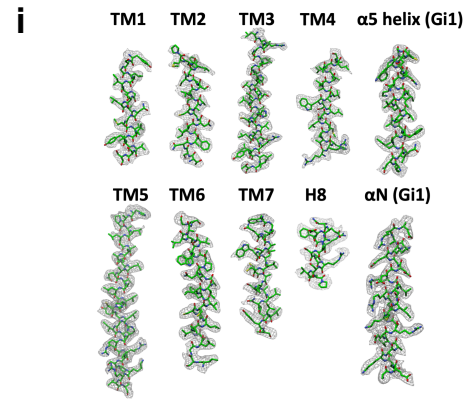

**Supplementary Fig. 1: Construct, function and cryo-EM data processing of 2-PCCA-GPR88-Gi1 signaling complex.** **a** Snake plot of secondary structure and amino acid sequence of GPR88 construct, regions that are not resolved in the cryo-EM map are labeled in gray. **b** Constitutive activity of GPCRs measured by the TGF- $\alpha$  shedding assay. Titrated GPCR plasmid (volumes per well in a 96-well plate) was transfected together with the AP-TGF $\alpha$  reporter plasmid in the presence or absence of the chimeric G $\alpha$ q/i1 plasmid. After 1-day incubation, exogenous GPCR-dependent (i.e., mock signal-subtracted) AP-TGF $\alpha$  response was quantified. M4D, Gi-coupled M4-DREADD, which does not respond to the endogenous ligand, acetylcholine<sup>84</sup>. CA, constitutively active mutant. Note that as compared with the absence of G $\alpha$ q/i1 transfection, co-expression of the G $\alpha$ q/i1 chimera enhanced M4D-CA and GPR88-WT signals and that, unlike the ligand-induced signal (Supplementary Fig. S4), GPR88-WT and G283V showed a similar response. Bars and error bars represent mean and s.e.m. of 3 independent experiments, each performed in quadruplicate. **c** Size exclusion chromatography profile and SDS-PAGE of the 2-PCCA-GPR88-Gi1 complex from more than three independent experiments. **d** Representative micrograph of the complex particles from 5778 micrographs. **e** Representative 2D averages. **f** Workflow for cryo-EM image processing. **g** Gold standard Fourier shell correlation (FSC) curve indicates overall nominal resolution at 2.4 Å using the FSC=0.143 criterion. **h** Local resolution map. **i** Representative density maps and models for TM1-7 and H8 of GPR88 as well as the N-terminal and C-terminal  $\alpha$  helices of G $\alpha$ i1 ( $\alpha$ N and  $\alpha$ 5). Source data are provided as a Source Data file.

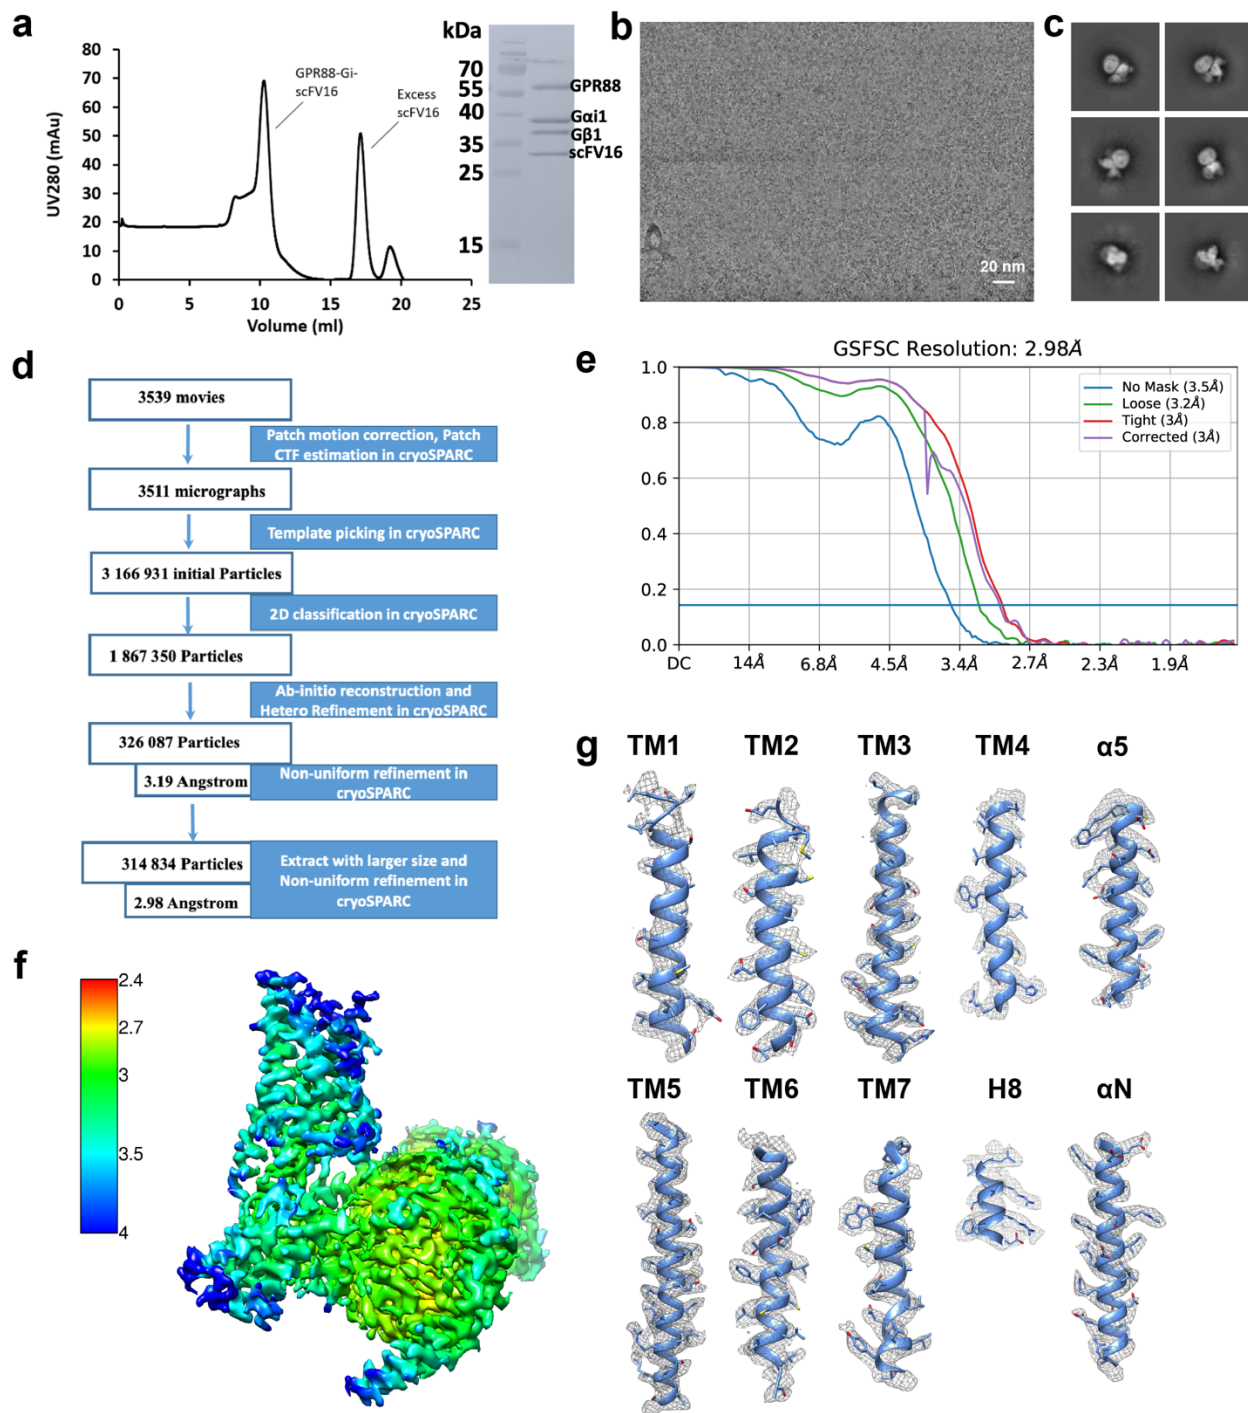

**Supplementary Fig. 2: cryo-EM data processing of GPR88-Gi1 signaling complex without 2-PCCA.** **a** Size exclusion chromatography profile and SDS-PAGE of the GPR88-Gi1 complex from more than three independent experiments. **b** Representative micrograph of the complex particles from 3511 micrographs. **c** Representative 2D averages. **d** Workflow

for cryo-EM image processing. **e** Gold standard Fourier shell correlation (FSC) curve indicates overall nominal resolution at 2.4 Å using the FSC=0.143 criterion. **f** Local resolution map. Source data are provided as a Source Data file. **g** Representative density maps and models for TM1-7 and H8 of GPR88 as well as the N-terminal and C-terminal  $\alpha$  helices of Gai1 ( $\alpha$ N and  $\alpha$ 5).

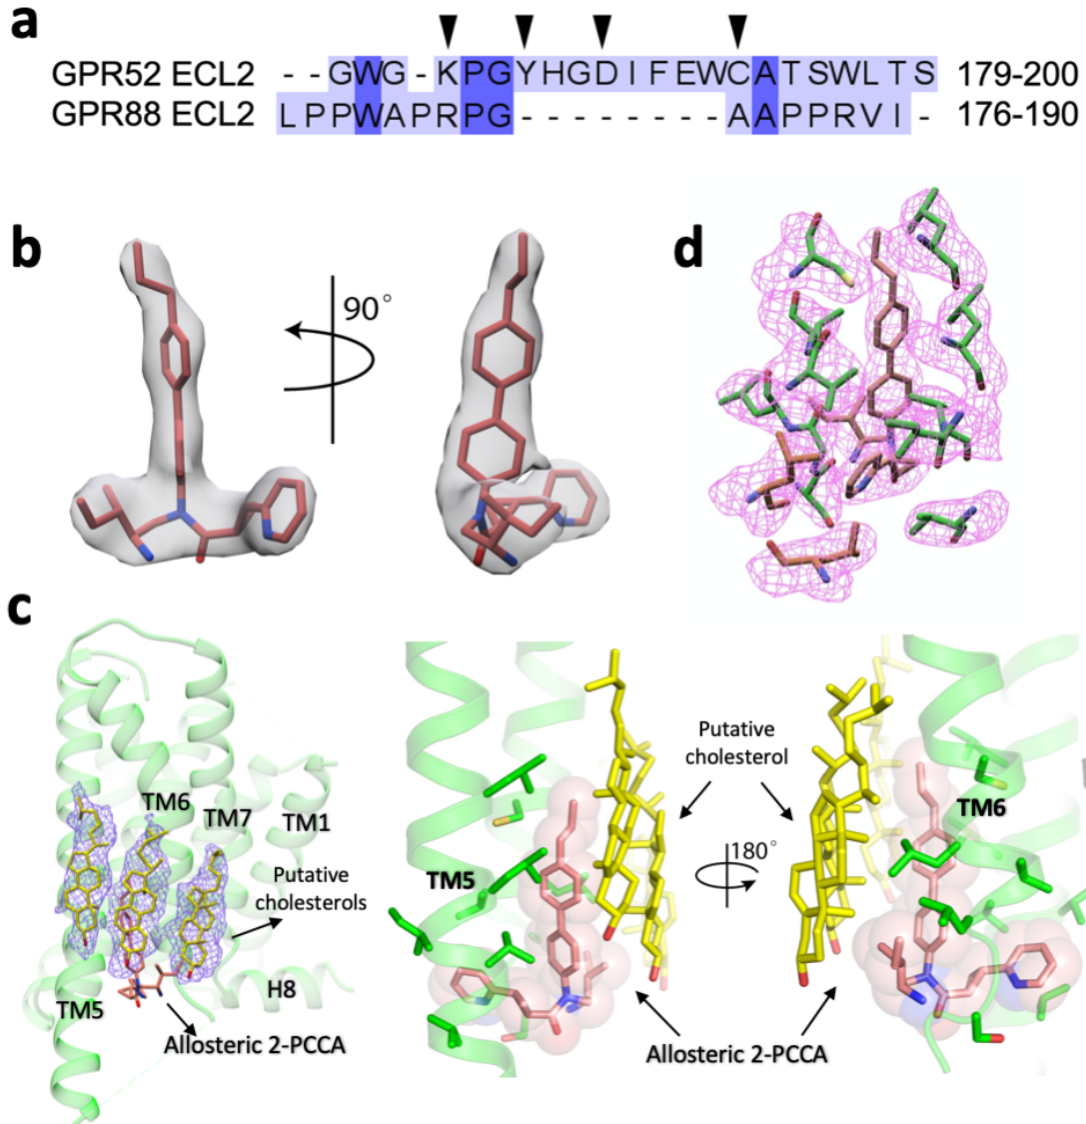

**Supplementary Fig. 3: Sequence alignment and ligand electron density maps.** **a** Structure-based sequence alignment of ECL2 between GPR52 and GPR88. **b** Density map of 2-PCCA from two different views. Black arrowheads indicate key residues for GPR52 self-activation. **c** Putative cholesterols observed on the side of the allosteric 2-PCCA. **d** Density map of residues of GPR88 that interact with 2-PCCA in the allosteric site.

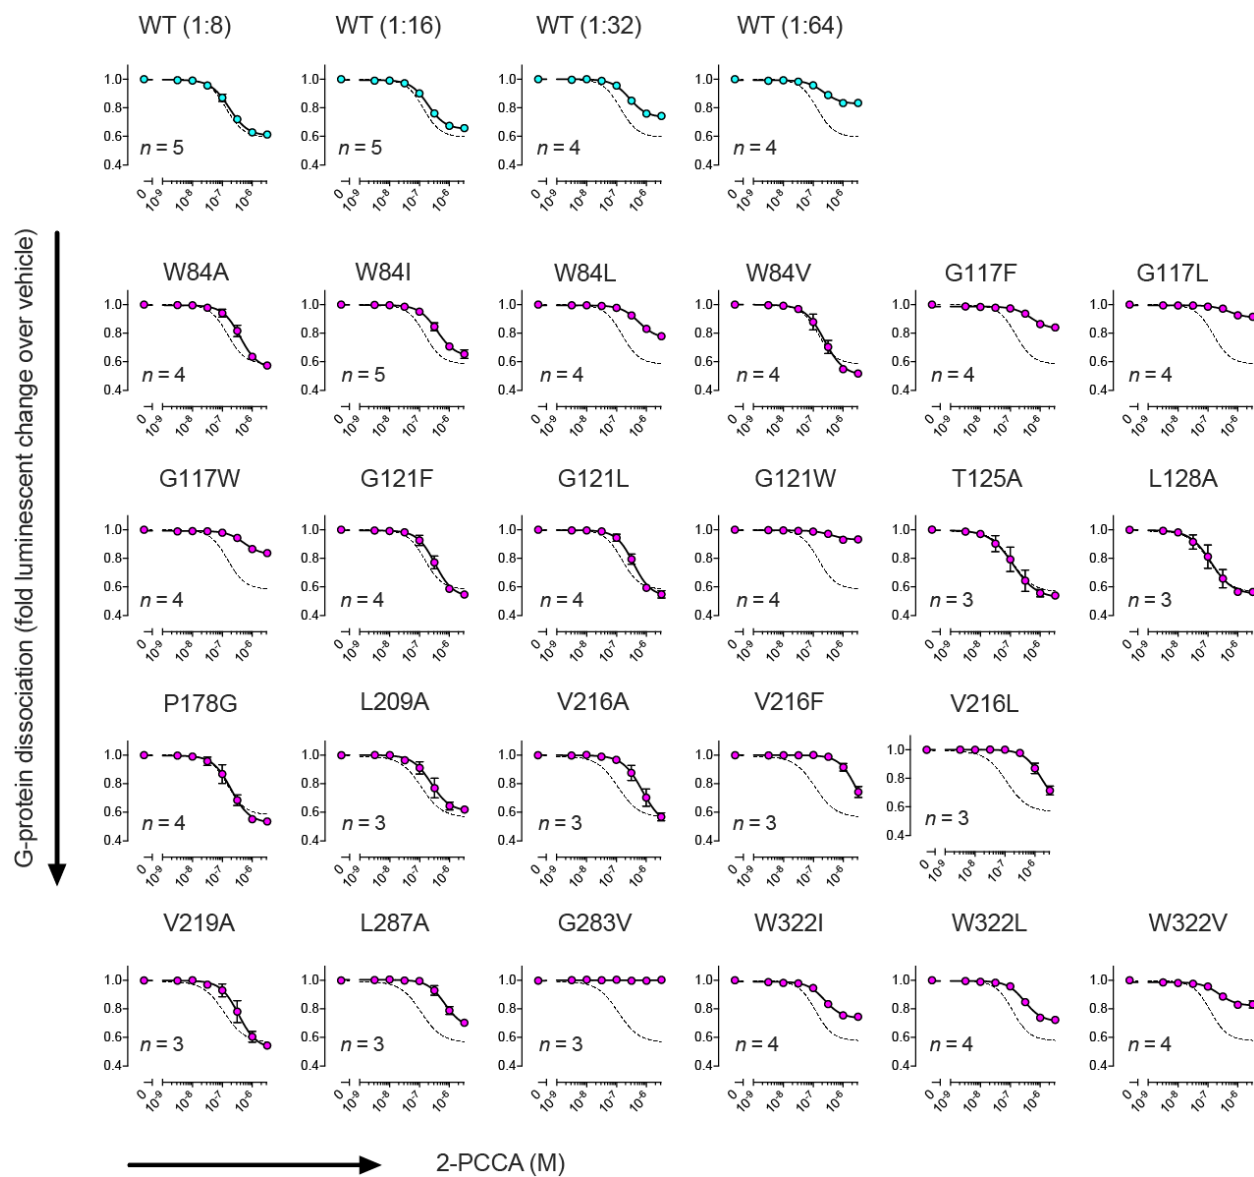

**Supplementary Fig. 4: NanoBiT G-protein dissociation assay**  
 Concentration–response curves for the NanoBiT-Gi dissociation signals for the titrated wild-type GPR88 and the indicated GPR88 mutants. Dashed line represents the wild-type GPR88 response. Symbols and error bars represent mean and s.e.m. of the indicated numbers of independent experiments, each performed in duplicate.

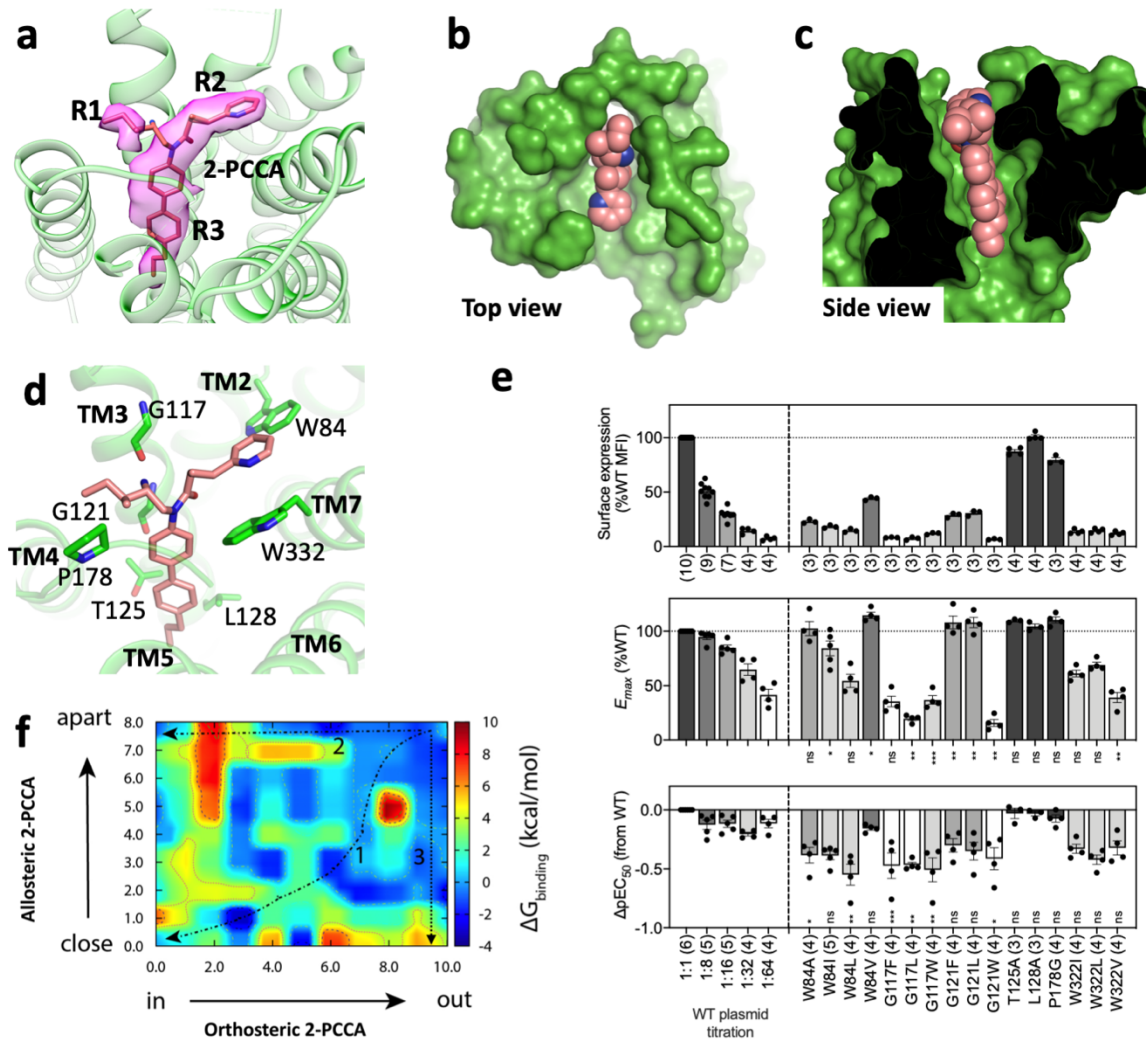

**Supplementary Fig. 5: Potential interaction of 2-PCCA with the orthosteric site.** **a** Modeling of 2-PCCA into the orthosteric density. **b, c** Molecular surface of the 2-PCCA-bound orthosteric pocket from top (**b**) and side (**c**) views. **d** Detailed interactions between 2-PCCA and the orthosteric pocket. **e** Cell surface expression and Gi-coupling activity were analyzed by the flow cytometry and the NanoBiT-Gi dissociation assay, respectively. From the concentration-response curves (Supplementary Fig. 4),  $E_{max}$  and  $\Delta pEC_{50}$  values relative to the wild type were calculated. Colors in the mutant bars indicate an expression level matching to that of titrated wild type. Bars and error bars represent mean and s.e.m. of 3-6 independent experiments (dots), denoted as the parenthesis



at the bottom of the figure panels. NA, parameter not available because of lack of ligand response. Statistical analyses were performed using the ordinary one-way ANOVA followed by the two-sided Sidak's post-hoc test with the expression-matched (colored) WT response. ns,  $p > 0.05$ ; \*,  $p < 0.05$ ; \*\*,  $p < 0.01$ ; \*\*\*,  $p < 0.001$ . **f** PDL/s-LRA binding free energy surface of orthosteric and allosteric 2-PCCA molecules with respect to their geometry center distances (Ångstrom) away from experimental binding coordinates. Route 2 and 3 show the binding of a single ligand in the absence of the other has either high barrier or binding free energy. Coupling of the two binding processes lowers the barrier and validates synergic effect (route 1). Source data are provided as a Source Data file.

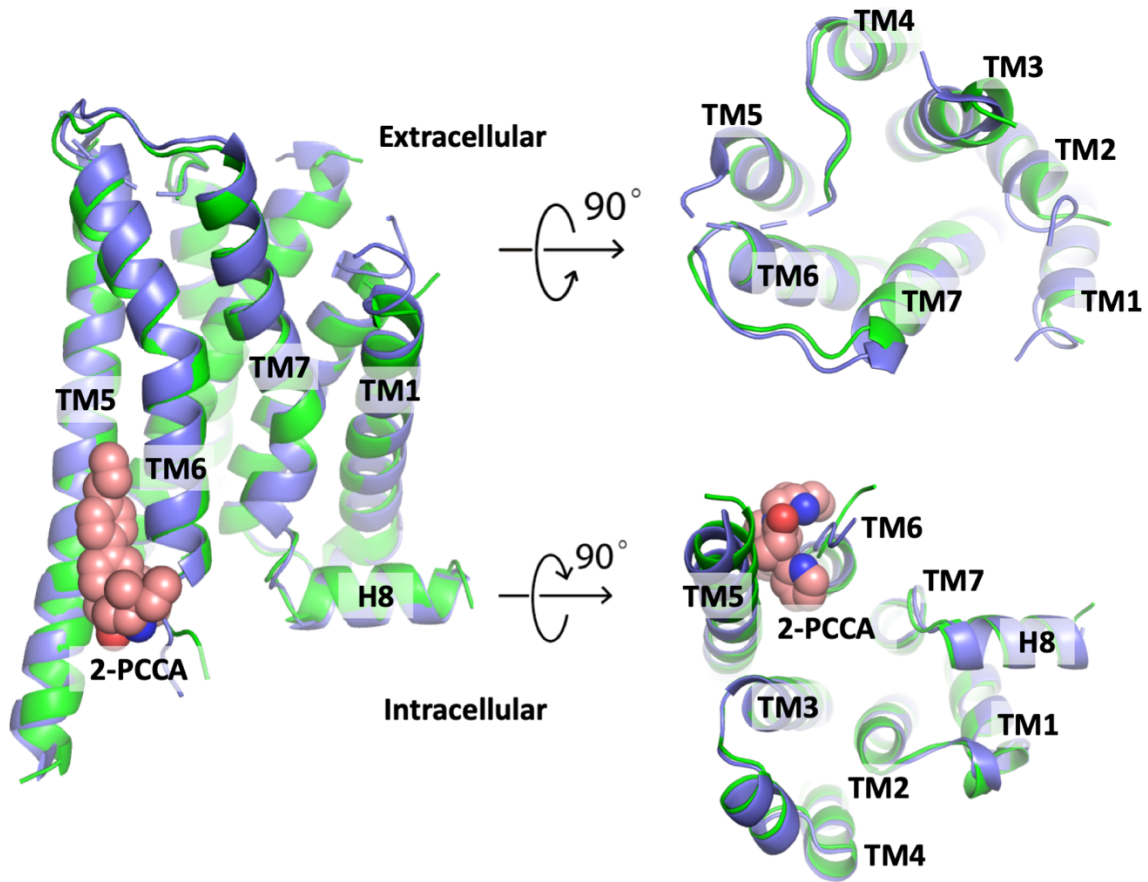

**Supplementary Fig. 6: Structural superimposition of GPR88.** Comparison of overall active GPR88 structures in the presence (green) or absence (blue) of 2-PCCA from the orthogonal, extracellular, and intracellular views. 2-PCCA is shown as sphere in salmon.

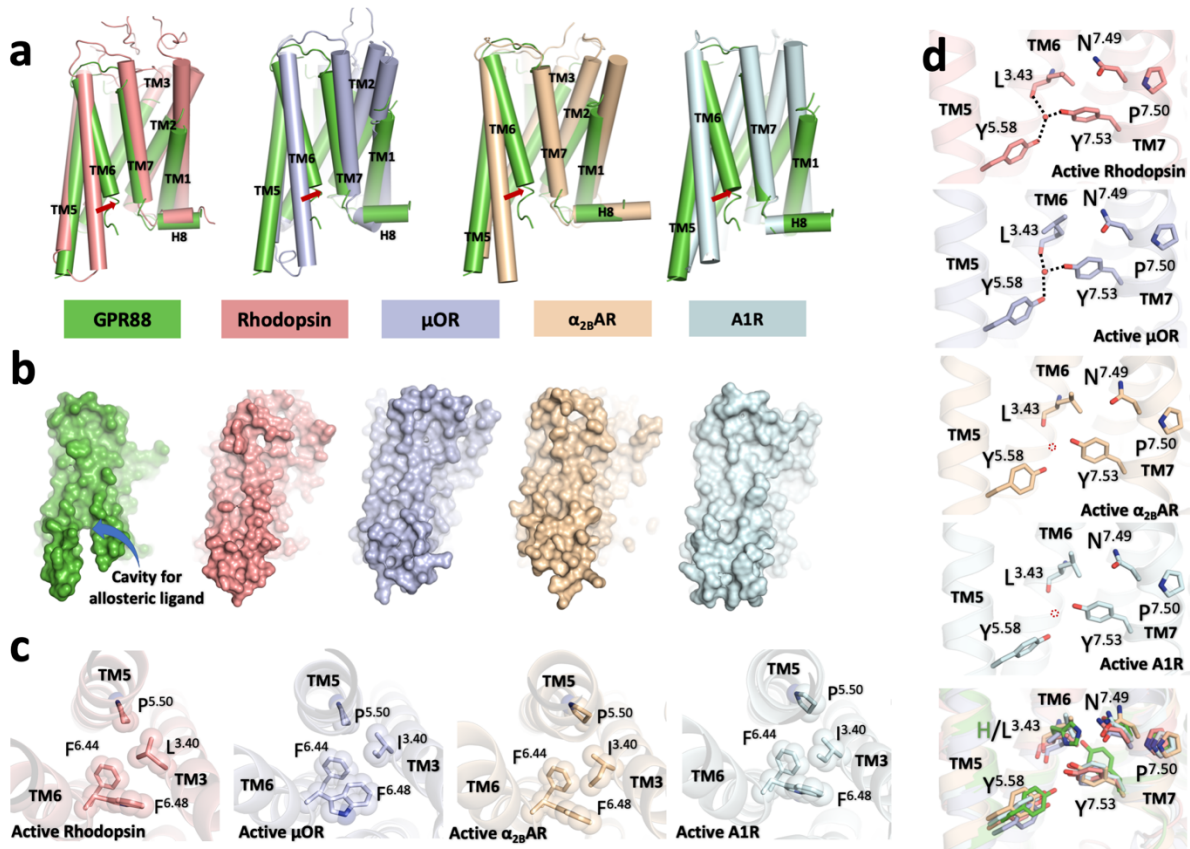

**Supplementary Fig. 7: Comparison of the active structures of GPR88 and representative class A GPCRs.** **a** Superimposition of active GPR88 structure with four different class A GPCRs rhodopsin (PDB:6CMO),  $\mu$ OR (PDB:6DDE),  $\alpha_{2B}$ AR (PDB:6K42) and A1R (PDB:6D9H). **b** Comparison of the surfaces of the TM5 and TM6 interface for GPR88 and other GPCRs. **c** The active conformation of the conserved toggle switch  $W^{6.48}$  and  $P^{5.50}$ - $I/L^{3.40}$ - $F^{6.44}$  motif. **d** The water-mediated polar interactions between the conserved  $Y^{5.58}$  and the  $N^{7.49}$ - $P^{7.50}$ - $xx$ - $Y^{7.53}$  motif.

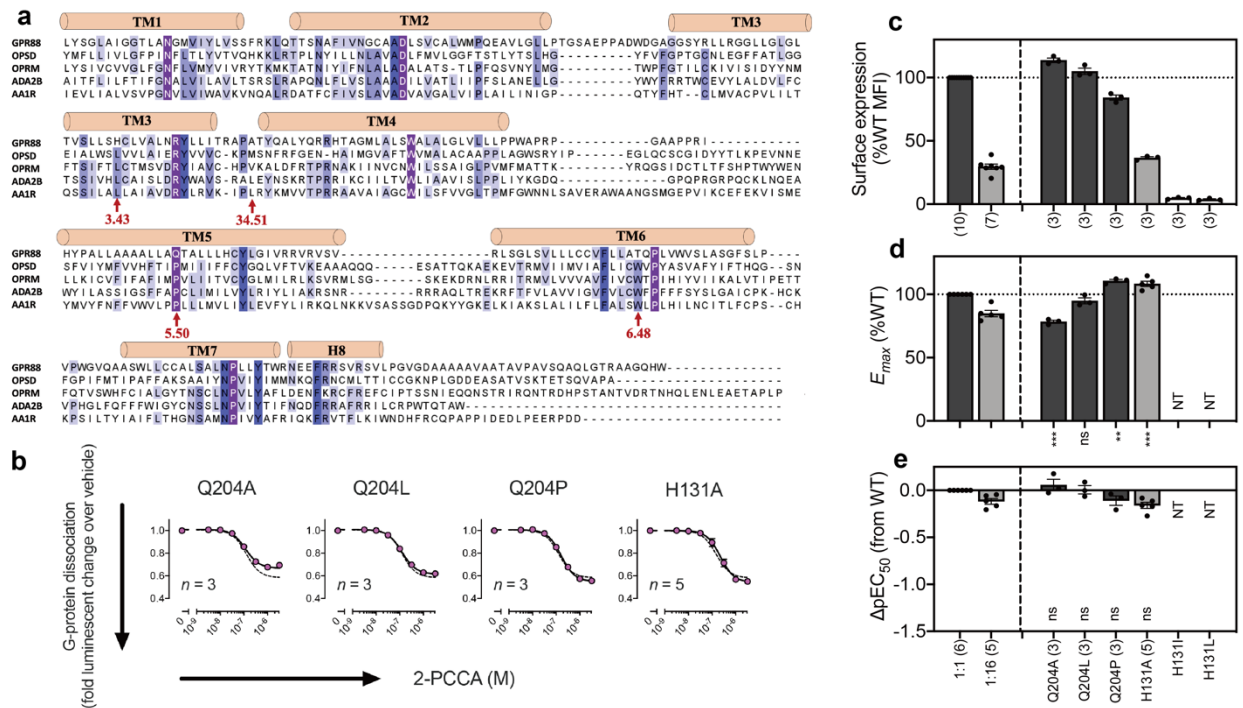

**Supplementary Fig. 8: Sequence alignment and mutant study for Q204<sup>5.50</sup> and H131<sup>3.43</sup>.** **a** Structure-based sequence alignment of GPR88 with representative class A GPCRs, residues 3.43, 34.51, 5.50 and 6.48 are highlighted as red arrows. Mutant study for Q204<sup>5.50</sup> and H131<sup>3.43</sup>. **b** Concentration–response curves for the NanoBiT-Gi dissociation signals. Dashed line represents the wild type GPR88 response (Fig. S1B). Symbols and error bars represent mean and s.e.m. of the indicated numbers of independent experiments, each performed in duplicate. **c** Cell surface expression analyzed by the flow cytometry. **d,e** Parameters for the Gi-coupling activity. From the concentration-response curves (**b**), E<sub>max</sub> (**d**) and ΔpEC<sub>50</sub> (**e**) values relative to the wild type were calculated. Colors in the mutant bars indicate an expression level matched to that of titrated wild type. Bars and error bars represent mean and s.e.m. of 3-6 independent experiments (denoted as the parenthesis at the bottom of the figure panels; note that **d** and **e** derived from the same dataset). NT, not tested because of too low surface expression levels. Statistical analyses were performed using the ordinary one-way ANOVA followed by the two-sided Sidak’s post-hoc test with the expression-matched

(colored) WT response. ns,  $p > 0.05$ ; \*,  $p < 0.05$ ; \*\*,  $p < 0.01$ ; \*\*\*,  $p < 0.001$ . Source data are provided as a Source Data file.

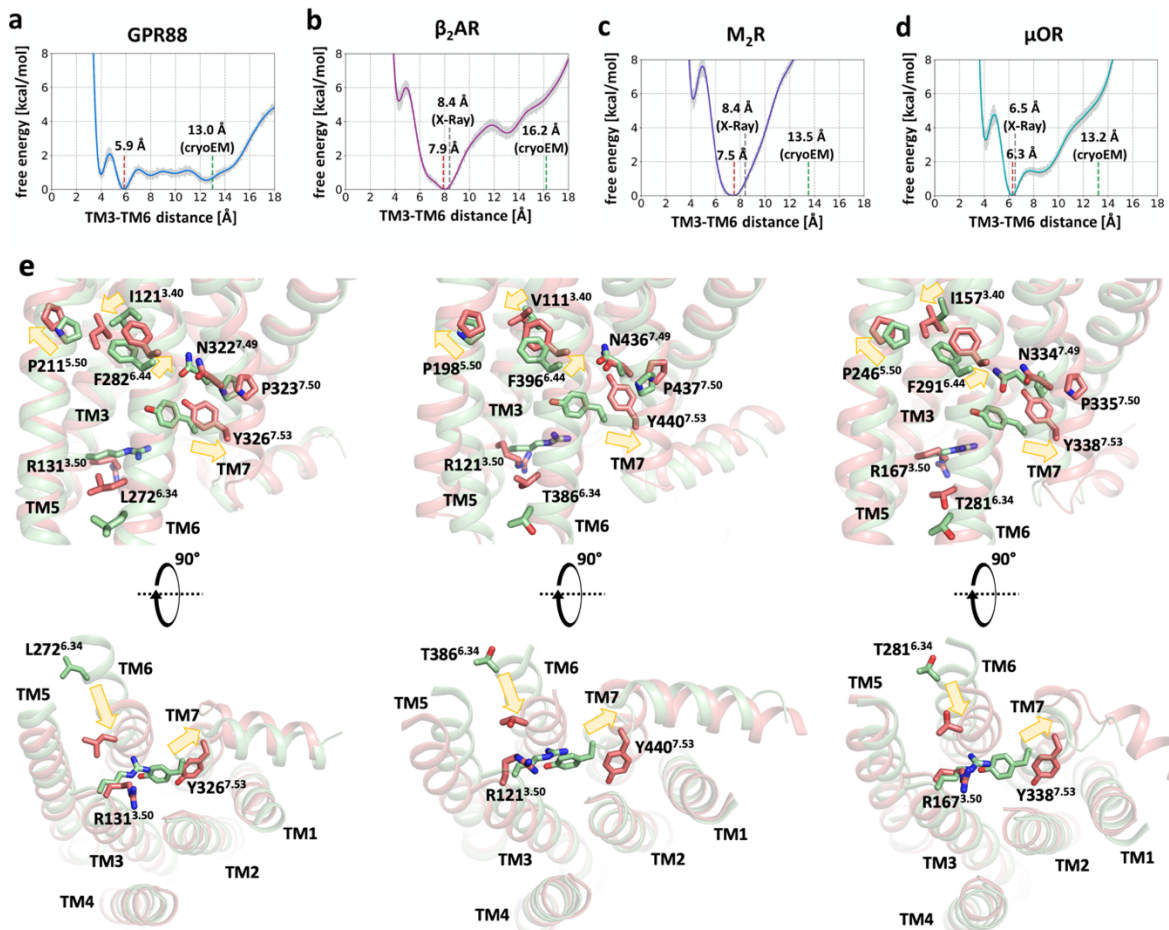

**Supplementary Fig. 9: Deactivation protocol applied to GPR88,  $\beta_2$ AR, M<sub>2</sub>R and  $\mu$ OR.** **a-d** Free energy landscapes along the TM3-TM6 distance obtained by metadynamics simulations after 8.64  $\mu$ s for GPR88 (**a**) and 10.56  $\mu$ s for  $\beta_2$ AR (**b**), M<sub>2</sub>R (**c**) and  $\mu$ OR (**d**). Error bars are indicated in gray and show that the global minima are more favorable compared to other local minima. **e** Calculated inactive models are shown in red and active-state cryo-EM structures in green ( $\beta_2$ AR: PDB-ID 6NI3; M<sub>2</sub>R: PDB-ID 6OIK;  $\mu$ OR: PDB-ID 6DDE). Key residues comprising the P<sup>5.50</sup>-I<sup>3.40</sup>-F<sup>6.44</sup> / P<sup>5.50</sup>-V<sup>3.40</sup>-F<sup>6.44</sup> motif and N<sup>7.49</sup>P<sup>7.50</sup>xxY<sup>7.53</sup> motif as well as residues in position 3.50 and 6.34 are shown in sticks. Key conformational rearrangements are highlighted with yellow arrows. Data are presented as the reconstructed free energy average  $\pm$  SEM in kcal/mol. Error analysis was performed applying block analysis

across the 32 walkers of each multiple walker metadynamics simulation ( $N=8.64 \times 10^6$  data points for GPR88 and  $N=10.56 \times 10^6$  data points for  $\beta$ 2AR, M2R and  $\mu$ OR, each), following the protocol of the Plumed Master ISDD tutorial 2020 ([https://www.plumed.org/doc-v2.6/user-doc/html/master-\\_i\\_s\\_d\\_d-2.html](https://www.plumed.org/doc-v2.6/user-doc/html/master-_i_s_d_d-2.html)). A block size of 500 was applied. PDB files of the calculated inactive receptor models are provided as supplementary file. Source data are provided as a Source Data file.

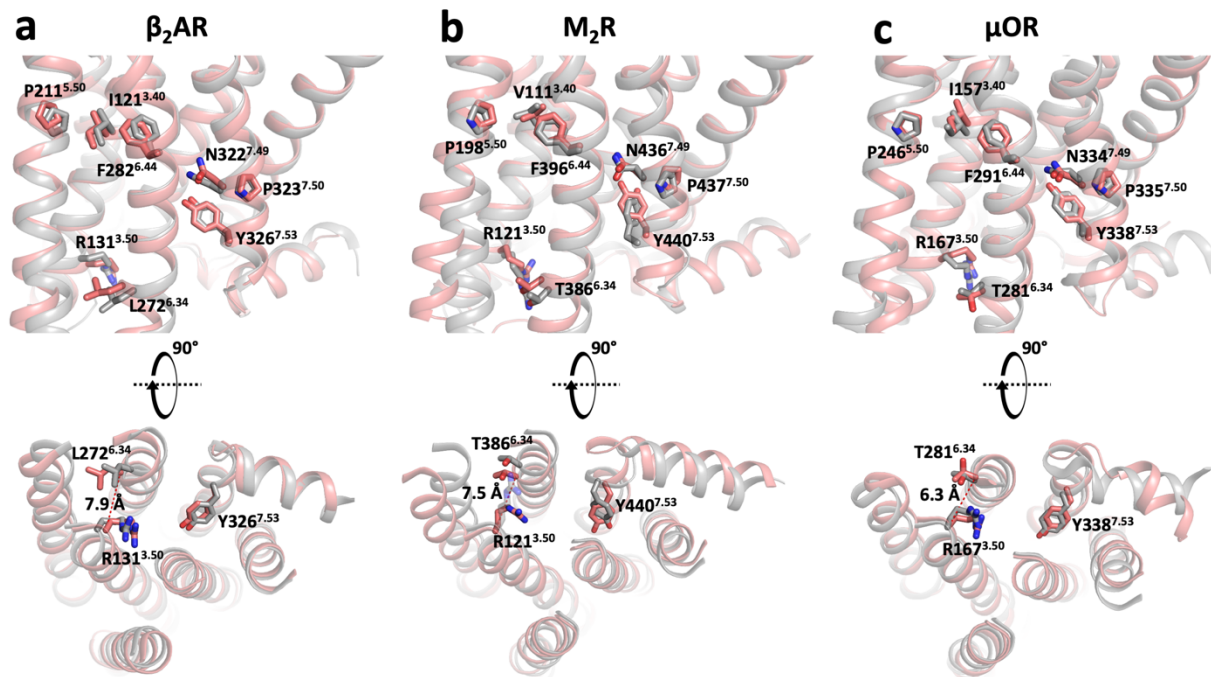

**Supplementary Fig. 10: Comparison of calculated inactive states with corresponding inactive-state crystal structures of  $\beta_2$ AR (a), M<sub>2</sub>R (b) and  $\mu$ OR (c).** Calculated inactive models are shown in red and inactive-state X-ray crystal structures in gray ( $\beta_2$ AR: PDB-ID 2RH1; M<sub>2</sub>R: PDB 5ZKC;  $\mu$ OR: PDB 4DKL). Key residues comprising the P<sup>5.50</sup>-I<sup>3.40</sup>-F<sup>6.44</sup>/ P<sup>5.50</sup>-V<sup>3.40</sup>-F<sup>6.44</sup> and the N<sup>7.49</sup>P<sup>7.50</sup>xxY<sup>7.53</sup> motif as well as residues in positions 3.50 and 6.34 are shown in sticks. Calculated RMSDs between the inactive-state model and the inactive X-ray crystal structures of  $\beta_2$ AR: 1.9 Å (transmembrane regions), 1.7 Å (TM 6), 1.0 Å (N<sup>7.49</sup>P<sup>7.50</sup>xxY<sup>7.53</sup>), 1.3 Å (P<sup>5.50</sup>-I<sup>3.40</sup>-F<sup>6.44</sup>); M<sub>2</sub>R: 2.2 Å (transmembrane regions), 1.8 Å (TM 6), 1.4 Å (N<sup>7.49</sup>P<sup>7.50</sup>xxY<sup>7.53</sup>), 0.6 Å (P<sup>5.50</sup>-V<sup>3.40</sup>-F<sup>6.44</sup>) and  $\mu$ OR: 2.2 Å (transmembrane regions), 1.0 Å (TM 6), 1.1 Å (N<sup>7.49</sup>P<sup>7.50</sup>xxY<sup>7.53</sup>), 1.1 Å (P<sup>5.50</sup>-I<sup>3.40</sup>-F<sup>6.44</sup>). Source data are provided as a Source Data file.



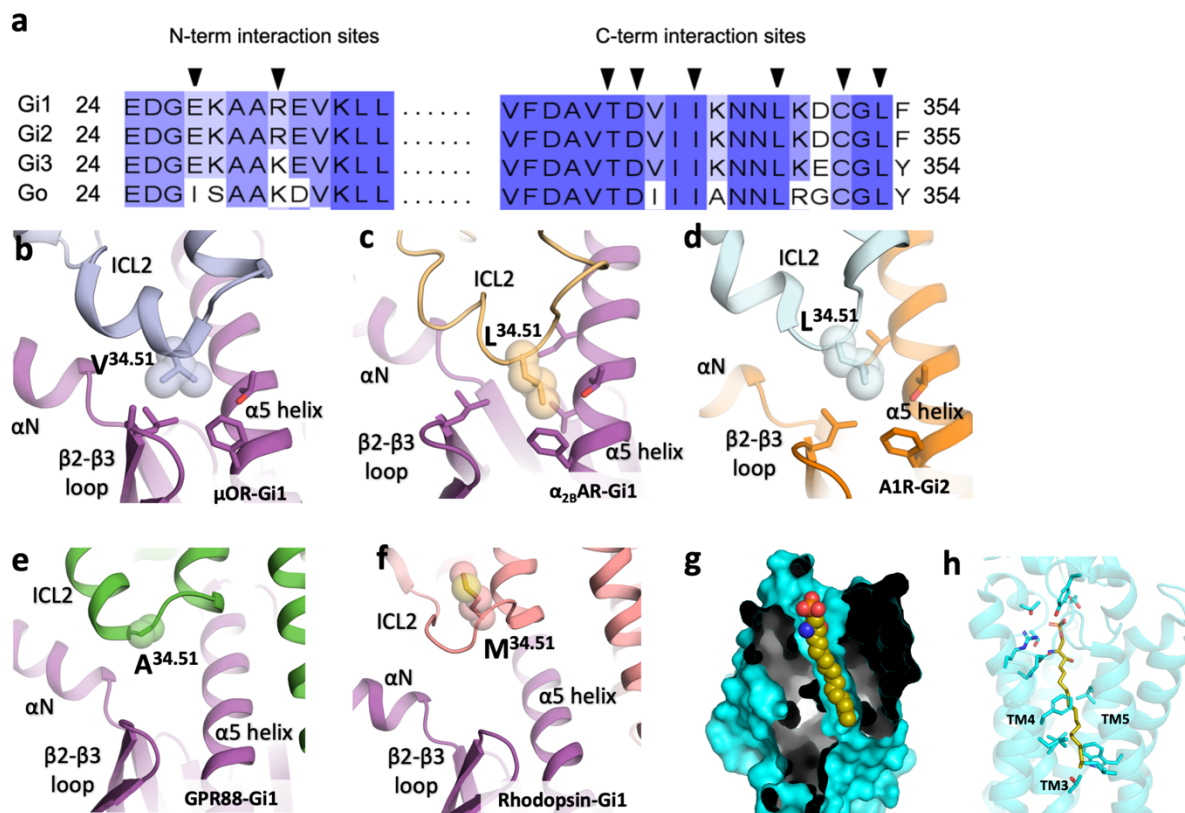

**Supplementary Fig. 11: Comparison of interactions between ICL2 and G-protein and the S1P binding pocket**

**a** Sequence alignment of the N-terminus and C-terminus of different Gi/o family G-proteins. **b-d** Hydrophobic interactions between residue 34.51 and the pocket form by  $\alpha$ N,  $\beta$ 2- $\beta$ 3 loop and  $\alpha$ 5 of  $G\alpha$  were observed for  $\mu$ OR-Gi1 (**b**, PDB: 6DDE),  $\alpha_{2B}$ AR-Gi1 (**c**, PDB: 6K42) and A1R-Gi2 (**d**, PDB: 6D9H). **e,f** Residue 34.51 positioned away from the  $G\alpha$  hydrophobic pocket for GPR88-Gi1 (**e**) and rhodopsin-Gi1(**f**, PDB: 6CMO). **g,h** The orthosteric binding pocket of S1P in S1PR3 (PDB: 7C4S). A hydrophobic tunnel is formed by TM3, TM4 and TM5, similar to the 2-PCCA orthosteric pocket in GPR88.

**Supplementary Table 1. Cryo-EM data collection, refinement and validation statistics.**

| <b>Data collection and processing</b> | <b>2-PCCA-GPR88-Gi1<br/>EMD-31164 PDB ID 7EJX</b> | <b>GPR88-Gi1<br/>EMD-32904 PDB ID 7WZ4</b> |
|---------------------------------------|---------------------------------------------------|--------------------------------------------|
| Magnification                         | 105,000                                           | 105,000                                    |
| Voltage (kV)                          | 300                                               | 300                                        |
| Electron exposure (e <sup>-</sup> /Å) | 53                                                | 53                                         |
| Defocus range (μm)                    | -1.0 to -2.0                                      | -1.0 to -2.0                               |
| Pixel size (Å)                        | 0.83                                              | 0.85                                       |
| Symmetry imposed                      | C1                                                | C1                                         |
| Initial particle images (no.)         | 4647118                                           | 3166931                                    |
| Final particle images (no.)           | 988958                                            | 314834                                     |
| Map resolution (Å)                    | 2.4                                               | 3.0                                        |
| FSC threshold                         | 0.143                                             | 0.143                                      |
| <b>Refinement</b>                     |                                                   |                                            |
| Initial model used (PDB code)         | 6DDE                                              | 7EJX                                       |
| Map sharpening B-factor (Å)           | -80                                               | -80                                        |
| <b>Model composition</b>              |                                                   |                                            |
| Non-hydrogen atoms                    | 8309                                              | 8187                                       |
| Protein residues                      | 1073                                              | 1075                                       |
| <b>B factor (Å)</b>                   |                                                   |                                            |
| Protein                               | 76.38                                             | 76.77                                      |
| Ligand                                | 99.22                                             |                                            |
| <b>R.m.s. deviations</b>              |                                                   |                                            |
| Bond lengths (Å)                      | 0.004                                             | 0.003                                      |
| Bond angles (°)                       | 0.955                                             | 0.580                                      |
| <b>Validation</b>                     |                                                   |                                            |
| MolProbity score                      | 1.63                                              | 1.24                                       |
| Clashscore                            | 10                                                | 3.2                                        |
| <b>Ramachandran plot</b>              |                                                   |                                            |
| Favored (%)                           | 97.23                                             | 97.34                                      |
| Allowed (%)                           | 2.77                                              | 2.66                                       |
| Disallowed (%)                        | 0                                                 | 0                                          |
