# Supplementary material for: Activation and allosteric regulation of the orphan GPR88-Gi1 signaling complex
Source: PubMed Central journal article supplement (PMC9061749; doi:10.1038/s41467-022-30081-5), 2022-05-02
Supplement: 41467_2022_30081_MOESM3_ESM.pdf [file 41467_2022_30081_MOESM3_ESM.pdf]

Supplementary Data 1.

The PDB file of the calculated inactive GPR88 model
